# Supplementary material for: Analysis of University Students’ Mental Health from the Perspective of Occupational Harmony
Source: bioRxiv or medRxiv preprint supplement (doi:10.1101/2024.08.16.24312033), 2024-08-19
Supplement: Supplementary file [file media-1.pdf]

**S1 Table. Themes and Subthemes Proposed by the Model of Occupational Harmony**

| Themes                                                                                                                         | Subthemes                                                                                                                                      | Meanings                                                                                                                                                                                                                                                                                                                                                                                    | Examples                                                                                                                                                                                                                                                                                              |
|--------------------------------------------------------------------------------------------------------------------------------|------------------------------------------------------------------------------------------------------------------------------------------------|---------------------------------------------------------------------------------------------------------------------------------------------------------------------------------------------------------------------------------------------------------------------------------------------------------------------------------------------------------------------------------------------|-------------------------------------------------------------------------------------------------------------------------------------------------------------------------------------------------------------------------------------------------------------------------------------------------------|
| Two-sided occupational characteristics<br>    | Physical engagement<br>Mental engagement<br>Quiet engagement<br>Active engagement<br>Individual engagement<br>Social engagement                | Engaging in occupations with heavy physical components.<br>Engaging in occupations with heavy mental components.<br>Engaging in calming and restorative occupations.<br>Engaging in demanding occupations.                                                                                                                                                                                  | Cleaning the house, brisk walking, playing sports<br>Reading a book, learning new knowledge, attending courses<br>Sleep, rest, meditation<br>Taking a test, vigorous exercise, work<br>Self-care, contemplation, rest<br>Visiting friends, attending parties                                          |
| Five-dimensional occupational engagement<br> | <i>De</i> (virtuous) engagement<br><i>Zhi</i> (rational) engagement<br><i>Gong</i> (productive) engagement<br><i>Ai</i> (emotional) engagement | Occupational engagement guided or required by morality, ethics, laws, religions, and customs, etc.<br>Occupational engagement that stimulates intellectual capacities and demonstrates rationality.<br>Occupational engagement that leads to accomplishment and contributions to groups, communities, and societies.<br>Occupational engagement that meets emotional needs and is generally | Participating in collective activities, serving others, managing responsibilities<br>Participating in reflective and consulting activities, reading a book, learning new skills<br>Completing coursework, work, household management<br>Participating in social activities, leisure and entertainment |

Multiple levels of human-environment transactions

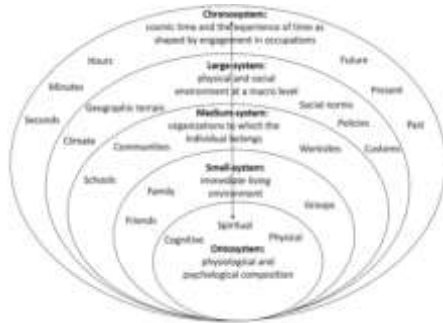

*Kang* (health maintenance) engagement

Ontosystem

Small-system

Medium-system

Large-system

Chronosystem

discretionary.

Occupational engagement that meets the basic needs of health maintenance, self-care, and safety.

The physiological and psychological composition of a person.

Immediate living environment

Organizations to which the individual belongs.

Physical and social environments at a macro level.

Cosmic time and the experience of time as shaped by engagement in occupations.

Sleep, rest, exercising, eating, drinking

Cognition, physical body, spirituality

Home, family, friends

Schools, communities, worksites

Geographic terrain, climate, social norms

Hours, minutes, seconds, future, present, past

The two-sided, five-dimensional, and multi-level characteristics can be used to portray each occupational engagement and are not mutually exclusive. The characteristics are mainly determined by people's motivation of and subjective feelings about their engagement (i.e., characteristics of human consciousness that drive occupational engagement).
