# Supplementary material for: Analysis of University Students’ Mental Health from the Perspective of Occupational Harmony
Source: bioRxiv or medRxiv preprint supplement (doi:10.1101/2024.08.16.24312033), 2024-08-19
Supplement: Supplementary file [file media-2.pdf]

**S2 Table. Profiles of 15 Participants in the Qualitative Study**

| No. | Gender | OHQ subjective scale score | DASS-21 results | Occupational engagement and mental health status (from interviews and a focus group discussion)                                                                                                                                                                                                                          |
|-----|--------|----------------------------|-----------------|--------------------------------------------------------------------------------------------------------------------------------------------------------------------------------------------------------------------------------------------------------------------------------------------------------------------------|
| A   | Female | 78.4                       | Normal          | <ul style="list-style-type: none"> <li>a. Lacked motivation and planning for study, had challenges in the internship, stayed up late and lacked exercise, limited social activity but got along well with family members</li> <li>b. Felt isolated and bored, worried about taking exams, hard to concentrate</li> </ul> |
| B   | Male   | 72.8                       | Normal          | <ul style="list-style-type: none"> <li>a. Had nothing to do at home, hard to complete assignments at school</li> <li>b. Felt bored and annoyed, anxious about academic pressure</li> </ul>                                                                                                                               |
| C   | Female | 71.2                       | Normal          | <ul style="list-style-type: none"> <li>a. Lack of planning and stayed up late to work on assignments, excessive entertainment at home, lacked exercise</li> <li>b. Enjoyed leisure time but felt stressed and anxious about studying, worried about physical health</li> </ul>                                           |
| D   | Female | 77.6                       | Normal          | <ul style="list-style-type: none"> <li>a. Very busy completing coursework and stayed up late, addicted to smartphones during home isolation, lack of exercise</li> <li>b. Felt lonely and stressed about study</li> </ul>                                                                                                |
| E   | Female | 61.6                       | Mild anxiety    | <ul style="list-style-type: none"> <li>a. Lack of planning and procrastinated in research, stayed up late,</li> <li>b. Felt lonely and anxious about meeting graduation requirements</li> </ul>                                                                                                                          |
| F   | Female | 73.6                       | Normal          | <ul style="list-style-type: none"> <li>a. Canceled an overseas exchange plan, stayed up late and busy with research projects at school, lacked exercise</li> <li>b. Felt a bit depressed but enjoyed time with family members during home isolation, felt anxious about academic competition</li> </ul>                  |

|   |        |      |                                                |                                                                                                                                                                                                                                                           |
|---|--------|------|------------------------------------------------|-----------------------------------------------------------------------------------------------------------------------------------------------------------------------------------------------------------------------------------------------------------|
| G | Female | 53.6 | Mild anxiety                                   | <ul style="list-style-type: none"> <li>a. Had nothing to do at home, spent time on screen over 10 h/d, had conflicts with parents and ran away from home</li> <li>b. Felt meaningless and anxious, worried about the graduate entrance exam</li> </ul>    |
| H | Female | 77.6 | Normal                                         | <ul style="list-style-type: none"> <li>a. Bauge-watching and staying up late during home isolation, lack of planning for further education</li> <li>b. Felt lonely at home, and very regretful about her academic failure</li> </ul>                      |
| I | Female | 65.6 | Severe anxiety, mild depression, mild stress   | <ul style="list-style-type: none"> <li>a. Canceled plans to study abroad, ate too much fast food, had difficulty connecting with others</li> <li>b. Felt devastated, isolated, and worried about her health and family members</li> </ul>                 |
| J | Male   | 51.2 | Normal                                         | <ul style="list-style-type: none"> <li>a. Slept too much (over 10-11h/d), lack of planning and was unable to work on the research project, limited participation in collective activities</li> <li>b. Felt afraid and worried about graduation</li> </ul> |
| K | Female | 47.2 | Severe anxiety, severe depression, mild stress | <ul style="list-style-type: none"> <li>a. Bauge-reading and staying up late all night during home isolation, lack of motivation to study, limited communication with others</li> <li>b. Felt depressed, had suicidal thoughts</li> </ul>                  |
| L | Male   | 70.4 | Normal                                         | <ul style="list-style-type: none"> <li>a. Lacked clear goals and plans for study, canceled travel plans, irregular sleep pattern</li> <li>b. Felt anxious about future</li> </ul>                                                                         |
| M | Female | 79.2 | Normal                                         | <ul style="list-style-type: none"> <li>a. Conctrented on graduation thesis, participated in some leisure activities (e.g., watching movies, jigsaw puzzles)</li> <li>b. Felt balanced and peaceful</li> </ul>                                             |

|   |        |      |                                                    |                                                                                                                                                                                                                                                                                                         |
|---|--------|------|----------------------------------------------------|---------------------------------------------------------------------------------------------------------------------------------------------------------------------------------------------------------------------------------------------------------------------------------------------------------|
| N | Female | 62.4 | Severe anxiety, severe depression, moderate stress | <ul style="list-style-type: none"> <li>a. Slept and rested over 12 h/d, read many books at home, lack of planning and had difficulty working on thesis</li> <li>b. Enjoyed life at home but felt anxious and stressed after returning to school</li> </ul>                                              |
| O | Female | 75.2 | Normal                                             | <ul style="list-style-type: none"> <li>a. Canceled plans to study abroad, had difficulty finding a job, concentrated on study and work, regular exercise, got along well with family members</li> <li>b. Felt miserable and unclear about future plans initially but got back to normal soon</li> </ul> |

---

OHQ: The Occupational Harmony Questionnaire, DASS-21: The Depression Anxiety Stress Scale. Participant experience content areas. a: Characteristics of occupational engagement; b: Overall statement on mental health. Participants A to K participated in individual interviews. Participants L to O participated in a focus group discussion.
